# Supplementary material for: Magnetic and Luminescence Properties of 8-Coordinated Pyridyl Adducts of Samarium(III) Complexes Containing 4,4,4-Trifluoro-1-(naphthalen-2-yl)-1,3-butanedionate
Source: MDPI journal article supplement (doi:10.3390/magnetochemistry8070072), 2022-07-11
Supplement: s1 [file s1]

## Supplementary Materials

# Magnetic and Luminescence Properties of 8-Coordinated Pyridyl Adducts of Samarium(III) Complexes Containing 4,4,4-Trifluoro-1-(naphthalen-2-yl)-1,3-butanedionate

Franz A. Mautner <sup>1,\*</sup>, Florian Bierbaumer <sup>1</sup>, Ramon Vicente <sup>2</sup>, Saskia Speed <sup>2</sup>, Ánnia Tubau <sup>2</sup>, Roland C. Fischer <sup>3</sup> and Salah S. Massoud <sup>4,5,\*</sup>

<sup>1</sup> Institute of Physical and Theoretical Chemistry, Graz University of Technology, Stremayrgasse 9, A-8010 Graz, Austria; bierbaumerflorian97@gmail.com

<sup>2</sup> Departament de Química Inorgànica i Orgànica, Universitat de Barcelona, Martí i Franquès 1-11, E-08028 Barcelona, Spain; rvicente@ub.edu (R.V.); saskia.speed@qi.ub.es (S.S.); anniatubau@ub.edu (Á.T.)

<sup>3</sup> Institute of Inorganic Chemistry, Graz University of Technology, Stremayrgasse 9, A-8010 Graz, Austria; roland.fischer@tugraz.at

<sup>4</sup> Department of Chemistry, University of Louisiana at Lafayette, P.O. Box 43700, Lafayette, LA 70504, USA

<sup>5</sup> Department of Chemistry, Faculty of Sciences, Alexandria University, Moharam Bey, Alexandria 21511, Egypt

\* Correspondence: mautner@tugraz.at (F.A.M.); ssmassoud@louisiana.edu (S.S.M.); Tel.: +43-316-873-32270 (F.A.M.); +13-374-825-672 (S.S.M.); Fax: +43-316-873-8225 (F.A.M.); +13-374-825-676 (S.S.M.)

| <b><u>Title</u></b>                                                                                                                                       | <b><u>Page #</u></b> |
|-----------------------------------------------------------------------------------------------------------------------------------------------------------|----------------------|
| Figures S1–S4. PXRD: Powder diffraction patterns of <b>1</b> - <b>4</b> complexes. ....                                                                   | 2                    |
| Figures S5–S8. Packing plots of compounds <b>1</b> – <b>4</b> . ....                                                                                      | 4                    |
| Tables S1–S4. Non-covalent interactions in compounds <b>1</b> – <b>4</b> . ....                                                                           | 6                    |
| Figure S9. Excitation spectra of compounds 1-4 monitored at the maximum emission wavelength of $649 \pm 2$ nm ( $^4G_{5/2} \rightarrow ^6H_{9/2}$ ). .... | 12                   |
| Figure S10. Deconvolution of the magnetic dipole allowed band $^4G_{5/2} \rightarrow ^6H_{7/2}$ . ....                                                    | 13                   |

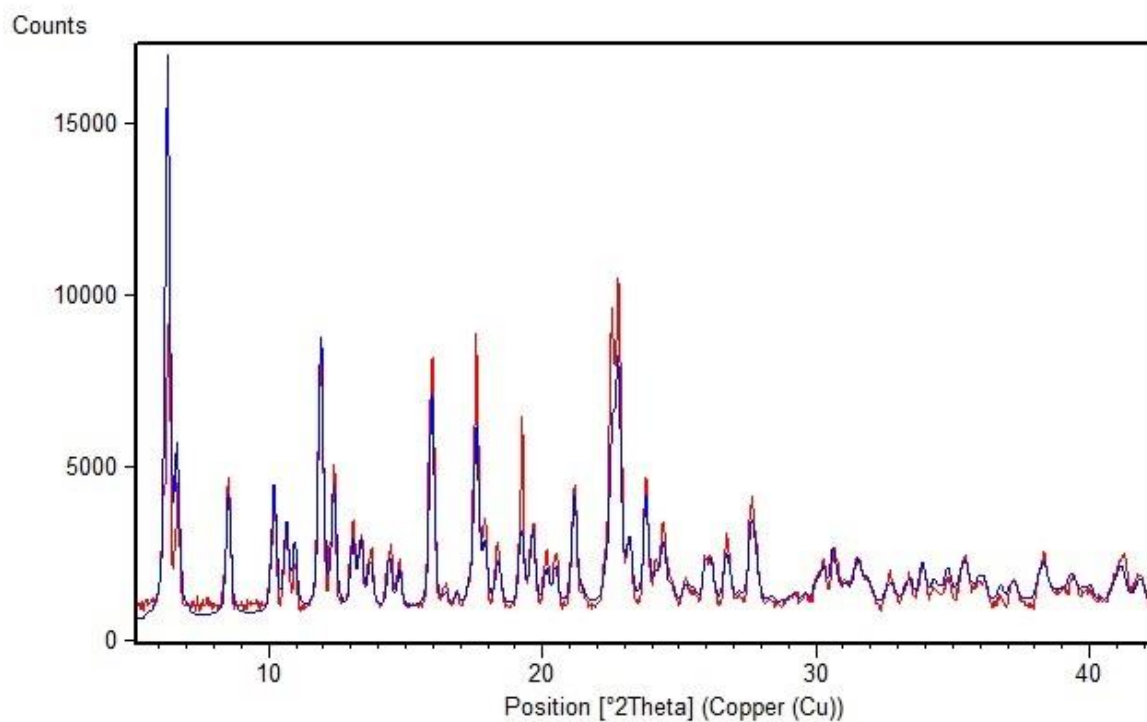

**Figure S1.** Observed (red) and simulated (blue) PXRD pattern of **1**.

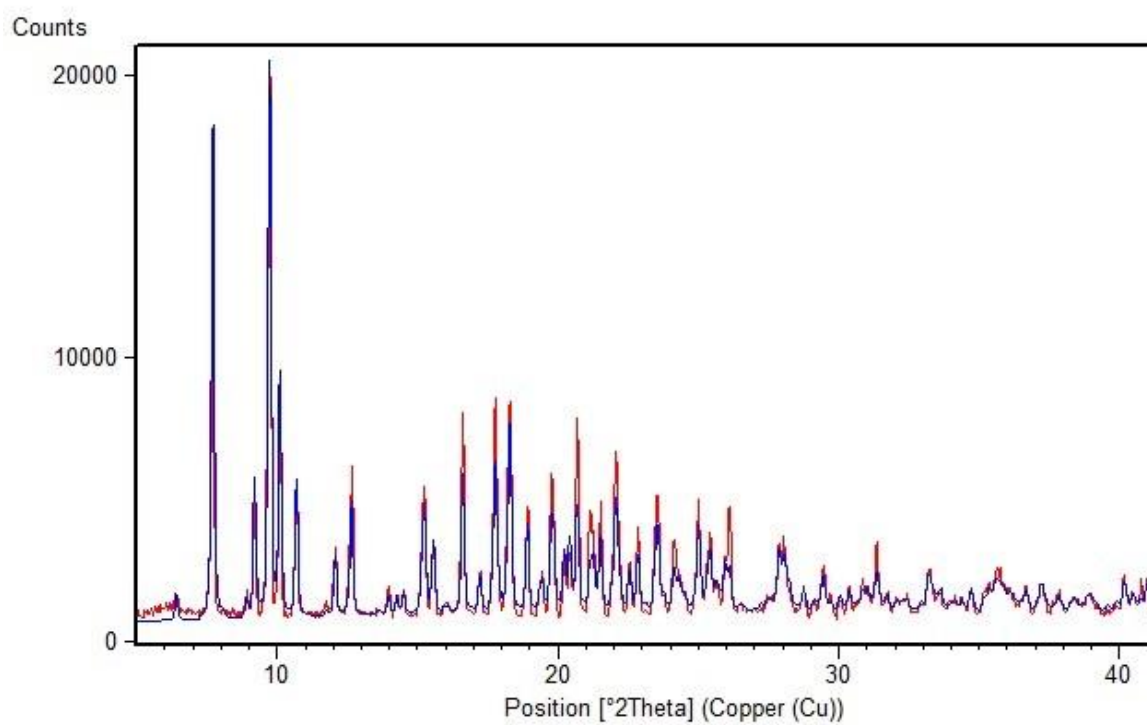

**Figure S2.** Observed (red) and simulated (blue) PXRD pattern of **2**.

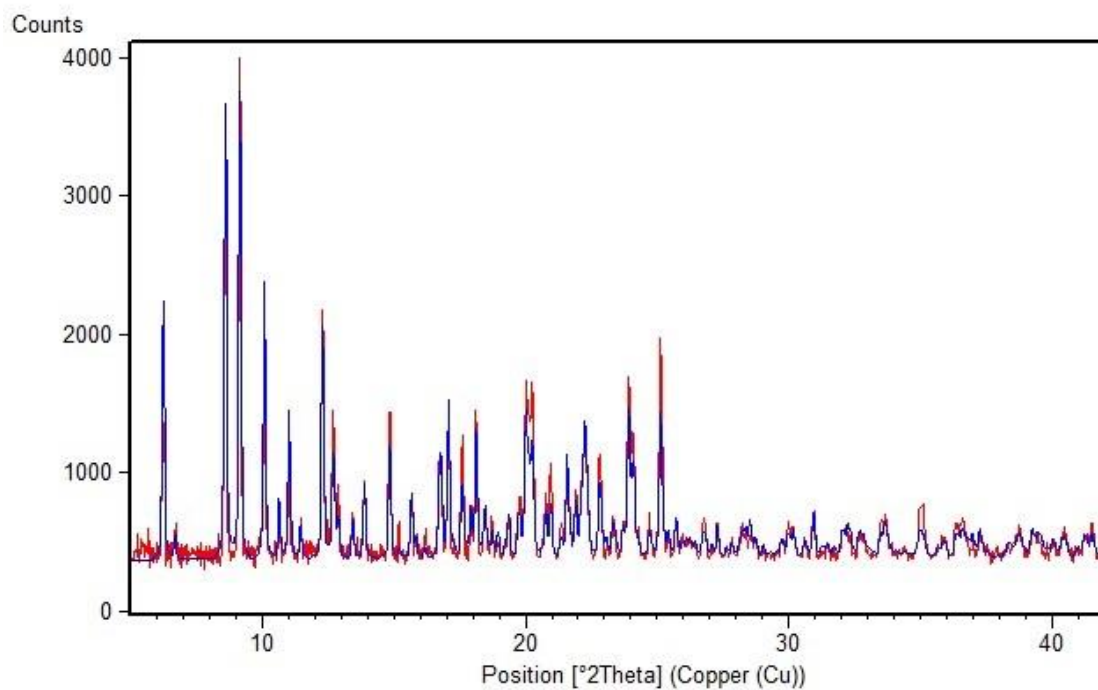

**Figure S3.** Observed (red) and simulated (blue) PXRd pattern of **3**.

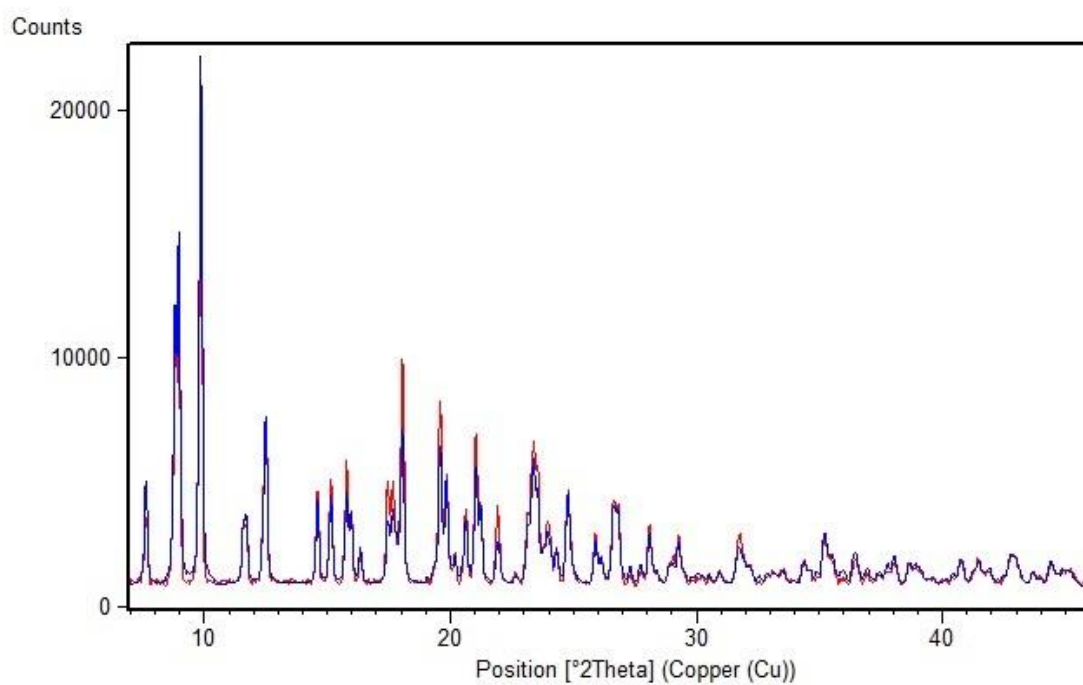

**Figure S4.** Observed (red) and simulated (blue) PXRd pattern of **4**.

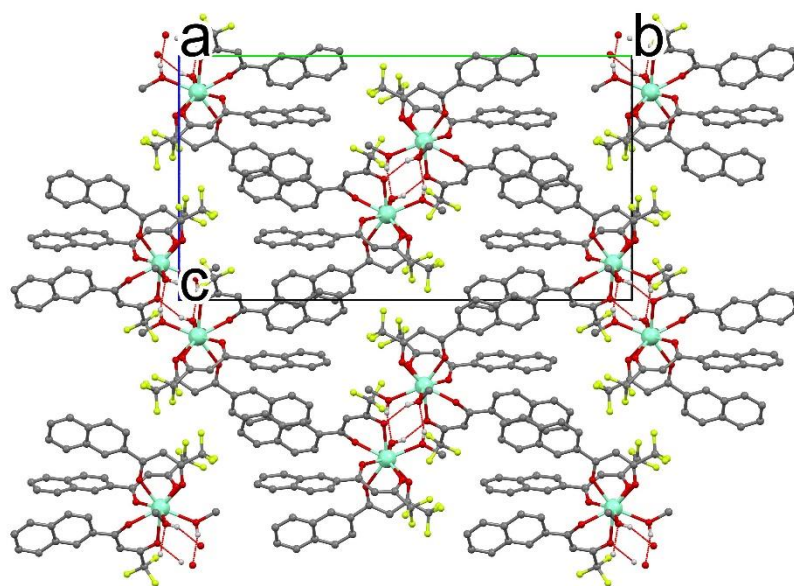

**Figure S5.** Packing plot of 1.

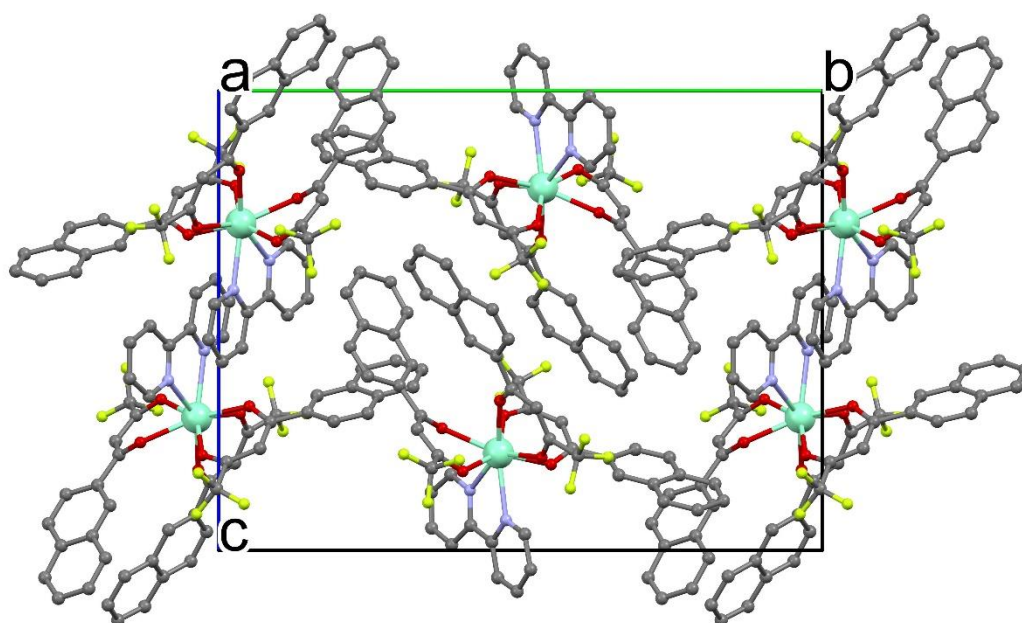

**Figure S6.** Packing plot of 2.

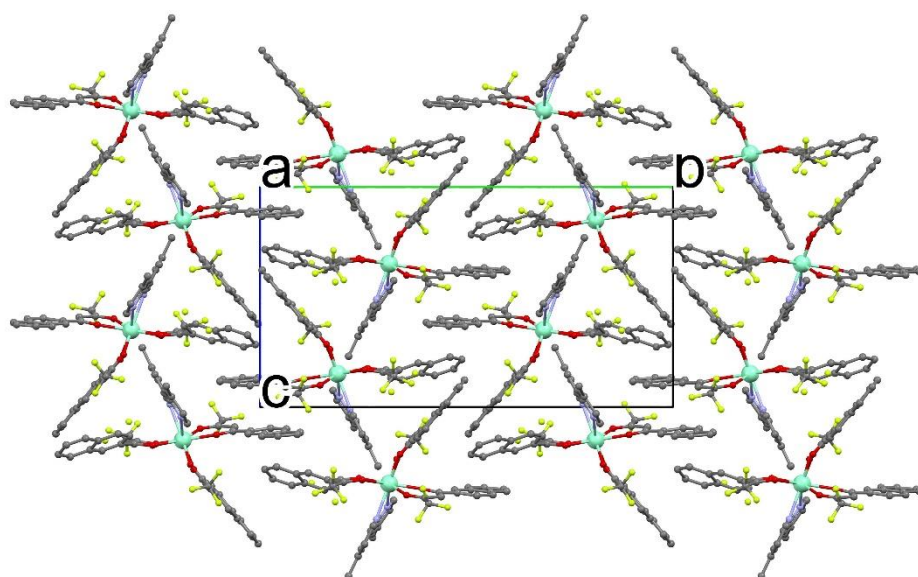

**Figure S7.** Packing plot of **3**.

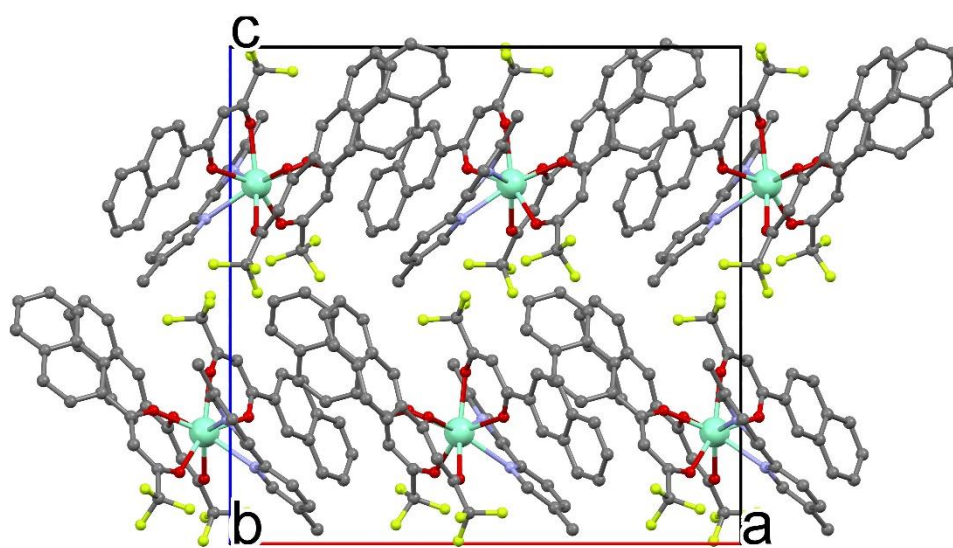

**Figure S8.** Packing plot of **4**.

**Table S1:** Noncovalent interactions in **1**.**Definition of aromatic ring systems:**

6-Membered Ring (1) C5 --&gt; C6 --&gt; C7 --&gt; C12 --&gt; C13 --&gt; C14 --&gt;

6-Membered Ring (2) C7 --&gt; C8 --&gt; C9 --&gt; C10 --&gt; C11 --&gt; C12 --&gt;

6-Membered Ring (3) C19 --&gt; C20 --&gt; C21 --&gt; C26 --&gt; C27 --&gt; C28 --&gt;

6-Membered Ring (4) C21 --&gt; C22 --&gt; C23 --&gt; C24 --&gt; C25 --&gt; C26 --&gt;

6-Membered Ring (5) C33 --&gt; C34 --&gt; C35 --&gt; C40 --&gt; C41 --&gt; C42 --&gt;

6-Membered Ring (6) C35 --&gt; C36 --&gt; C37 --&gt; C38 --&gt; C39 --&gt; C40 --&gt;

10-Membered Ring (7) C5 --&gt; C6 --&gt; C7 --&gt; C8 --&gt; C9 --&gt; C10 --&gt; C11 --&gt; C12 --&gt; C13 --&gt; C14 --&gt;

10-Membered Ring (8) C19 --&gt; C20 --&gt; C21 --&gt; C22 --&gt; C23 --&gt; C24 --&gt; C25 --&gt; C26 --&gt; C27 --&gt; C28 --&gt;

10-Membered Ring (9) C33 --&gt; C34 --&gt; C35 --&gt; C36 --&gt; C37 --&gt; C38 --&gt; C39 --&gt; C40 --&gt; C41 --&gt; C42

**Analysis of Short-Ring Interactions:**

- Cg(I) = Plane number I (= ring number in () above)

- Cg-Cg = Distance between ring Centroids (Ang.)

|     |     |        |            |
|-----|-----|--------|------------|
| Cg3 | Cg6 | [4565] | 3,7185(16) |
| Cg4 | Cg5 | [4565] | 3,7535(16) |
| Cg4 | Cg6 | [4565] | 4,0157(16) |
| Cg5 | Cg8 | [4564] | 4,1695(14) |
| Cg6 | Cg8 | [4564] | 3,6734(14) |
| Cg8 | Cg9 | [4565] | 3,7390(13) |
| Cg9 | Cg3 | [4564] | 4,1561(14) |
| Cg9 | Cg4 | [4564] | 3,6940(14) |

|        |                 |
|--------|-----------------|
| [4564] | X,3/2-Y,-1/2+Z  |
| [4665] | 1+X,3/2-Y,1/2+Z |

**Analysis of X-H...Cg(Pi-Ring) Interactions**

- Cg(J) = Center of gravity of ring J (Plane number above)

- X-H...Cg = X-H-Cg angle (degrees)

- X..Cg = Distance of X to Cg (Angstrom)

| X--H(I) | Cg(J) | [ARU(J)] | H..Cg | X-H..Cg | X..Cg    |
|---------|-------|----------|-------|---------|----------|
| C8-H8   | Cg3   | [1555]   | 2,68  | 149     | 3,527(3) |

|  |         |     |        |      |     |          |
|--|---------|-----|--------|------|-----|----------|
|  | C8-H8   | Cg8 | [1555] | 2,80 | 137 | 3,553(3) |
|  | C13-H13 | Cg6 | [1655] | 2,85 | 141 | 3,638(3) |
|  | C13-H13 | Cg9 | [1655] | 2,66 | 134 | 3,391(3) |
|  | C22-H22 | Cg1 | [4565] | 2,71 | 142 | 3,510(3) |
|  | C39-H39 | Cg2 | [4464] | 2,88 | 143 | 3,682(3) |
|  | C39-H39 | Cg7 | [4464] | 2,94 | 134 | 3,666(3) |

  

|        |                   |
|--------|-------------------|
| [1555] | X,Y,Z             |
| [1655] | 1+X,Y,Z           |
| [4565] | X,3/2-Y,1/2+Z     |
| [4464] | -1+X,3/2-Y,-1/2+Z |

**Table S2:** Noncovalent interactions in **2**.

**Definition of aromatic ring systems:**

6-Membered Ring (1) N1 --> C43 --> C44 --> C45 --> C46 --> C47 -->

6-Membered Ring (2) N2 --> C48 --> C49 --> C50 --> C51 --> C52 -->

6-Membered Ring (3) C5 --> C6 --> C7 --> C12 --> C13 --> C14 -->

6-Membered Ring (4) C7 --> C8 --> C9 --> C10 --> C11 --> C12 -->

6-Membered Ring (5) C19 --> C20 --> C21 --> C26 --> C27 --> C28 -->

6-Membered Ring (6) C21 --> C22 --> C23 --> C24 --> C25 --> C26 -->

6-Membered Ring (7) C33 --> C34 --> C35 --> C40 --> C41 --> C42 -->

6-Membered Ring (8) C35 --> C36 --> C37 --> C38 --> C39 --> C40 -->

10-Membered Ring (9) C5 --> C6 --> C7 --> C8 --> C9 --> C10 --> C11 --> C12 --> C13 --> C14

10-Membered Ring (10) C19 --> C20 --> C21 --> C22 --> C23 --> C24 --> C25 --> C26 --> C27 --> C28

10-Membered Ring (11) C33 --> C34 --> C35 --> C36 --> C37 --> C38 --> C39 --> C40 --> C41 --> C42

**Analysis of Short-Ring Interactions**

- Cg(I) = Plane number I (= ring number in () above)

- Cg-Cg = Distance between ring Centroids (Ang.)

| Cg(I) | Cg(J) | [ARU(J)] | Cg-Cg    |
|-------|-------|----------|----------|
| Cg1   | Cg2   | [3565]   | 3,867(2) |
| Cg1   | Cg4   | [4564]   | 4,174(2) |
| Cg5   | Cg5   | [3666]   | 3,691(2) |

|        |                |
|--------|----------------|
| [3565] | -X,1-Y,-Z      |
| [4564] | X,3/2-Y,-1/2+Z |
| [4565] | X,3/2-Y,1/2+Z  |
| [3666] | 1-X,1-Y,1-Z    |

#### Analysis of X-H...Cg(Pi-Ring) Interactions

- Cg(J) = Center of gravity of ring J (Plane number above)

- X-H...Cg = X-H-Cg angle (degrees)

- X...Cg = Distance of X to Cg (Angstrom)

| X--H(I) | Cg(J) | [ARU(J)] | H..Cg | X-H..Cg | X..Cg    |
|---------|-------|----------|-------|---------|----------|
| C22-H22 | Cg3   | [1555]   | 2,76  | 145     | 3,574(4) |
| C22-H22 | Cg9   | [1555]   | 2,64  | 159     | 3,546(4) |
| C37-H37 | Cg10  | [2645]   | 2,87  | 131     | 3,563(4) |
| C38-H38 | Cg5   | [2645]   | 2,84  | 135     | 3,579(4) |

|        |                  |
|--------|------------------|
| [1555] | X,Y,Z            |
| [2645] | 1-X,-1/2+Y,1/2-Z |

#### Analysis of Y-F...Cg(Pi-Ring) Interactions

| Y--F(I) | Cg(J) | [ARU(J)] | F..Cg    | Y-F..Cg  | Y..Cg    |
|---------|-------|----------|----------|----------|----------|
| C1-F2   | Cg8   | [2655]   | 3,238(3) | 133,7(2) | 4,276(4) |
| C1-F2   | Cg11  | [2655]   | 3,457(2) | 151,6(2) | 4,680(4) |

|        |                 |
|--------|-----------------|
| [2655] | 1-X,1/2+Y,1/2-Z |
|--------|-----------------|

**Table S3:** Noncovalent interactions in **3**.

#### Definition of aromatic ring systems:

6-Membered Ring (2) N2 --> C48 --> C49 --> C50 --> C51 --> C52 -->

6-Membered Ring (5) C19 --> C20 --> C21 --> C26 --> C27 --> C28 -->

6-Membered Ring (6) C21 --> C22 --> C23 --> C24 --> C25 --> C26 -->



### Analysis of Short-Ring Interactions

- Cg(I) = Plane number I (= ring number in () above)

- Cg-Cg = Distance between ring Centroids (Ang.)

| Cg(I) | Cg(J) | [ARU(J)] | Cg-Cg    |
|-------|-------|----------|----------|
| Cg5   | Cg5   | [3766]   | 3,784(2) |
| Cg5   | Cg6   | [3766]   | 3,993(2) |
| Cg6   | Cg5   | [3766]   | 3,993(2) |

|        |             |
|--------|-------------|
| [3766] | 2-X,1-Y,1-Z |
|--------|-------------|

### Analysis of X-H...Cg(Pi-Ring) Interactions

- Cg(J) = Center of gravity of ring J (Plane number above)

- X-H...Cg = X-H-Cg angle (degrees)

- X..Cg = Distance of X to Cg (Angstrom)

| X--H(I) | Cg(J) | [ARU(J)] | H..Cg | X-H..Cg | X..Cg    |
|---------|-------|----------|-------|---------|----------|
| C14-H14 | Cg2   | [1555]   | 2,81  | 159     | 3,710(4) |
| C25-H25 | Cg2   | [3766]   | 2,90  | 148     | 3,748(4) |

|        |             |
|--------|-------------|
| [1555] | X,Y,Z       |
| [3766] | 2-X,1-Y,1-Z |

### Analysis of Y-F...Cg(Pi-Ring) Interactions

| Y--F(I) | Cg(J) | [ARU(J)] | F..Cg   | Y-F..Cg   | Y..Cg    |
|---------|-------|----------|---------|-----------|----------|
| C1-F3A  | Cg6   | [2645]   | 3,88(3) | 128,9(14) | 4,937(5) |

|        |                    |
|--------|--------------------|
| [2645] | 3/2-X,-1/2+Y,1/2-Z |
|--------|--------------------|

**Table S4:** Noncovalent interactions in **4**.

**Definition of aromatic ring systems:**

6-Membered Ring (1) N1 --> C43 --> C44 --> C45 --> C46 --> C47 -->

6-Membered Ring (2) N2 --> C49 --> C50 --> C51 --> C52 --> C53 -->

6-Membered Ring (3) C5 --> C6 --> C7 --> C12 --> C13 --> C14 -->

6-Membered Ring (4) C7 --> C8 --> C9 --> C10 --> C11 --> C12 -->

6-Membered Ring (5) C19 --> C20 --> C21 --> C26 --> C27 --> C28 -->

6-Membered Ring (6) C21 --> C22 --> C23 --> C24 --> C25 --> C26 -->

6-Membered Ring (7) C33 --> C34 --> C35 --> C40 --> C41 --> C42 -->

6-Membered Ring (8) C35 --> C36 --> C37 --> C38 --> C39 --> C40 -->

10-Membered Ring (9) C5 --> C6 --> C7 --> C8 --> C9 --> C10 --> C11 --> C12 --> C13 --> C14

10-Membered Ring (10) C19 --> C20 --> C21 --> C22 --> C23 --> C24 --> C25 --> C26 --> C27 --> C28

10-Membered Ring (11) C33 --> C34 --> C35 --> C36 --> C37 --> C38 --> C39 --> C40 --> C41 --> C42

**Analysis of Short-Ring Interactions:**

- Cg(I) = Plane number I (= ring number in () above)

- Cg-Cg = Distance between ring Centroids (Ang.)

| Cg(I) | Cg(J) | [ARU(J)] | Cg-Cg    |
|-------|-------|----------|----------|
| Cg3   | Cg7   | [4465]   | 3,591(3) |
| Cg3   | Cg8   | [4465]   | 3,852(3) |
| Cg3   | Cg11  | [4465]   | 3,516(3) |
| Cg4   | Cg7   | [4465]   | 3,832(4) |
| Cg7   | Cg9   | [4565]   | 3,500(3) |
| Cg9   | Cg7   | [4465]   | 3,500(3) |
| Cg9   | Cg11  | [4465]   | 3,798(3) |

|        |              |
|--------|--------------|
| [4465] | -1/2+X,1-Y,Z |
| [4565] | 1/2+X,1-Y,Z  |

**Analysis of X-H...Cg(Pi-Ring) Interactions**

- Cg(J)= Center of gravity of ring J (Plane number above)

- X-H...Cg = X-H-Cg angle (degrees)

- X...Cg = Distance of X to Cg (Angstrom)

| X--H(I) | Cg(J) | [ARU(J)] | H...Cg | X-H...Cg | X...Cg   |
|---------|-------|----------|--------|----------|----------|
| C39-H39 | Cg5   | [4565]   | 2,95   | 146      | 3,782(6) |
| C45-H45 | Cg7   | [1545]   | 2,78   | 117      | 3,330(8) |

|        |             |
|--------|-------------|
| [4565] | 1/2+X,1-Y,Z |
| [1545] | X,-1+Y,Z    |

#### Analysis of Y-F...Cg(Pi-Ring) Interactions

| Y--F(I) | Cg(J) | [ARU(J)] | F...Cg   | Y-X...Cg | Y...Cg   |
|---------|-------|----------|----------|----------|----------|
| C15-F5  | Cg6   | [3654]   | 3,031(4) | 125,6(3) | 3,963(6) |
| C15-F5  | Cg10  | [3654]   | 3,352(4) | 143,0(3) | 4,494(6) |
| C29-F8  | Cg2   | [2755]   | 3,495(5) | 137,1(3) | 4,573(7) |

|        |                |
|--------|----------------|
| [3654] | 3/2-X,Y,-1/2+Z |
| [2755] | 2-X,-Y,1/2+Z   |

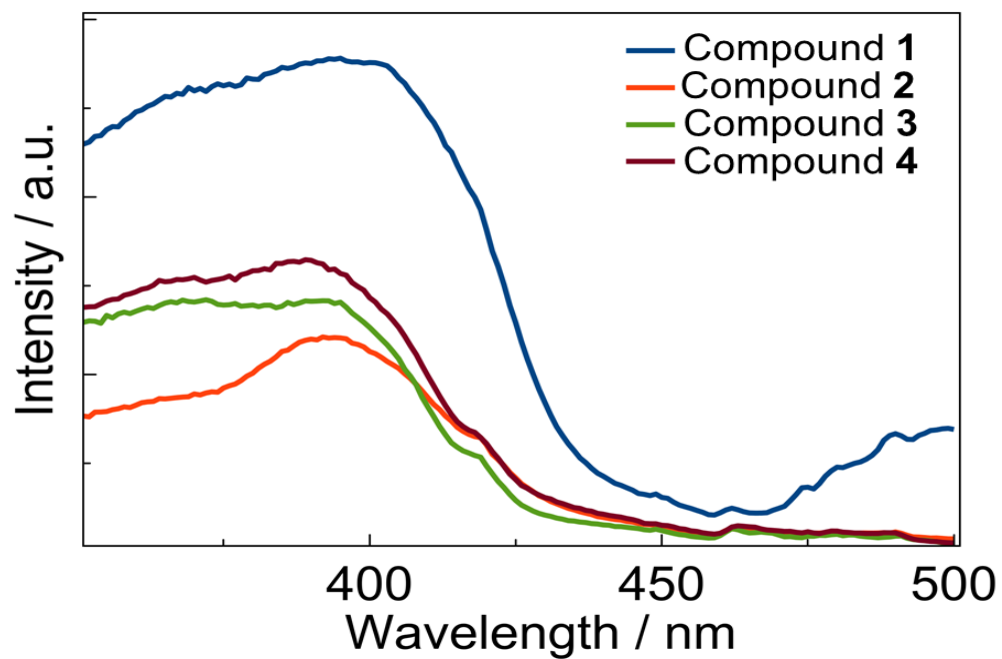

**Figure S9.** Excitation spectra of compounds **1-4** monitored at the maximum emission wavelength of  $649 \pm 2$  nm ( ${}^4G_{5/2} \rightarrow {}^6H_{9/2}$ ).

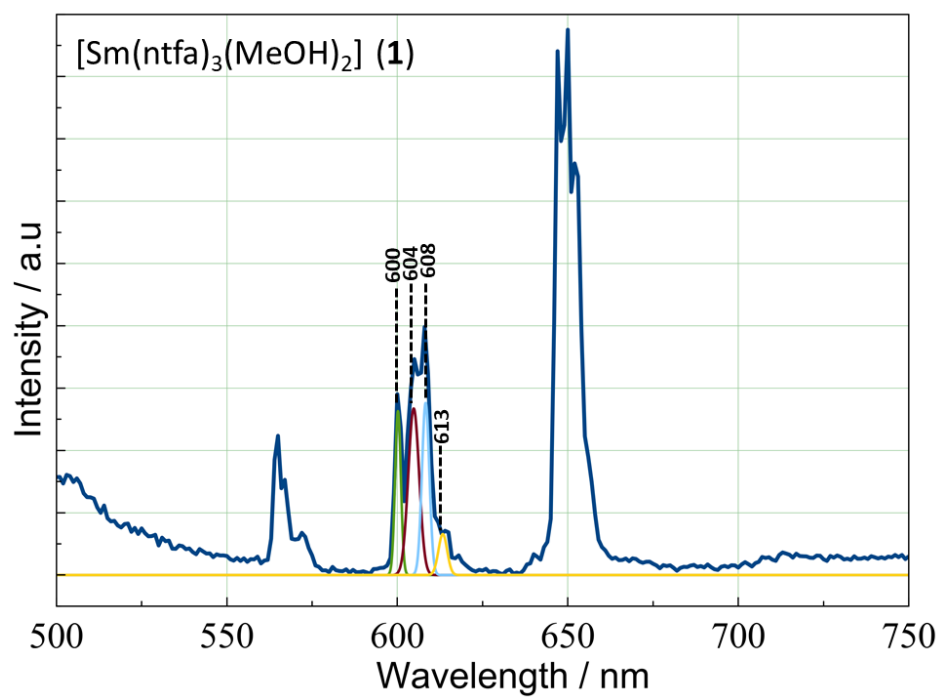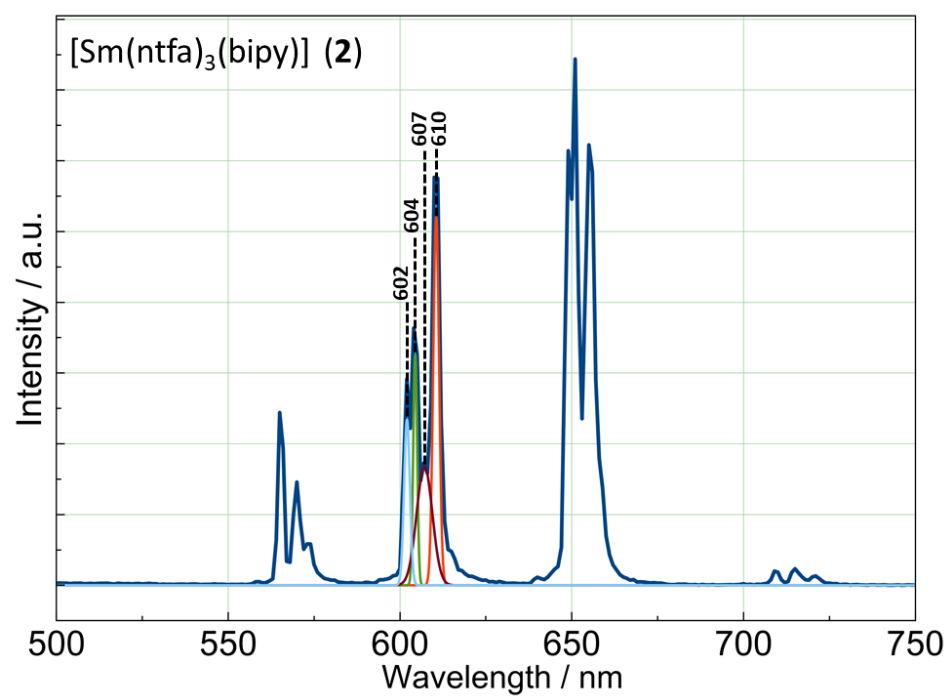

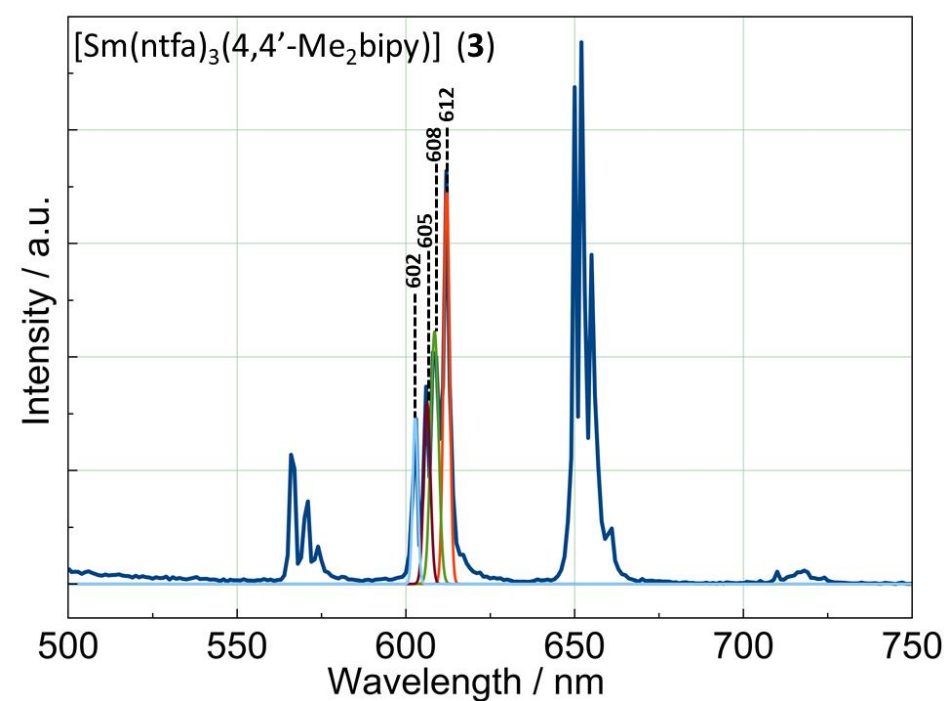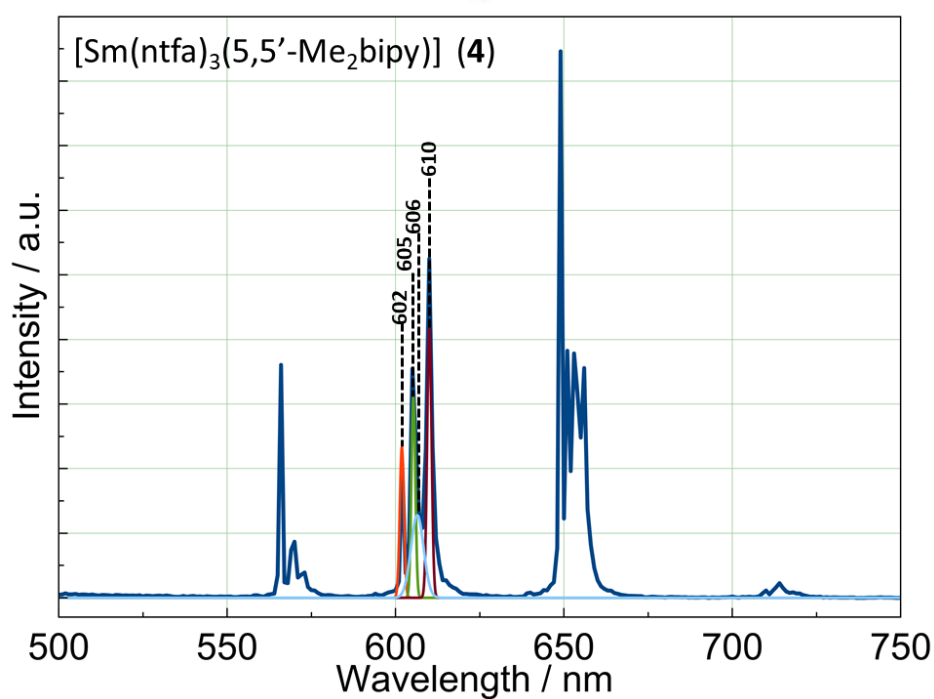

**Figure S10.** Deconvolution of the magnetic-dipole-allowed band  $^4G_{5/2} \rightarrow ^6H_{7/2}$ .
